# Supplementary material for: Health Benefits of Apple Juice Consumption: A Review of Interventional Trials on Humans
Source: MDPI journal article supplement (doi:10.3390/nu14040821), 2022-02-16
Supplement: s1 [file s1]

## Supplementary Material

**Table S1.** Dietary value of a medium-sized apple with skin.

| Nutrient                          | Unit | 1 medium fruit<br>(7cm diameter/182 g) |
|-----------------------------------|------|----------------------------------------|
| <b>Macronutrients</b>             |      |                                        |
| Moisture                          | g    | 155.72                                 |
| Ash                               | g    | 0.35                                   |
| Protein                           | g    | 0.47                                   |
| Total Fat                         | g    | 0.31                                   |
| Carbohydrate                      | g    | 25.13                                  |
| Energy                            | kCal | 95                                     |
| <b>Carbohydrates</b>              |      |                                        |
| Fibre, total dietary              | g    | 3.5                                    |
| Starch                            | g    | 0.09                                   |
| Glucose                           | g    | 4.42                                   |
| Fructose                          | g    | 10.74                                  |
| Maltose                           | g    | 0.00                                   |
| Galactose                         | g    | 0.00                                   |
| Lactose                           | g    | 0.00                                   |
| Sucrose                           | g    | 3.77                                   |
| Sorbitol                          | g    | 0.55                                   |
| Sugars, total                     | g    | 18.91                                  |
| <b>Minerals</b>                   |      |                                        |
| Calcium, Ca                       | mg   | 11                                     |
| Iron, Fe                          | mg   | 0.22                                   |
| Magnesium, Mg                     | mg   | 9                                      |
| Phosphorus, P                     | mg   | 20                                     |
| Potassium, K                      | mg   | 195                                    |
| Sodium, Na                        | mg   | 2                                      |
| Zinc, Zn                          | mg   | 0.07                                   |
| Copper, Cu                        | mg   | 0.049                                  |
| Manganese, Mn                     | mg   | 0.064                                  |
| Selenium, Se                      | µg   | 0.0                                    |
| <b>Vitamins</b>                   |      |                                        |
| Beta carotene                     | µg   | 49                                     |
| Alpha carotene                    | µg   | 0                                      |
| Retinol                           | µg   | 0                                      |
| Retinol activity equivalents, RAE | µg   | 5                                      |
| Folacin, total                    | µg   | 5                                      |

|                                 |    |       |
|---------------------------------|----|-------|
| Folic acid, synthetic form      | µg | 0     |
| Folate, naturally occurring     | µg | 5     |
| Dietary folate equivalents, DFE | µg | 5     |
| Niacin                          | mg | 0.166 |
| Niacin equivalents              | NE | 0.196 |
| Pantothenic acid                | mg | 0.111 |
| Riboflavin                      | mg | 0.047 |
| Thiamin                         | mg | 0.031 |
| Vitamin B-6                     | mg | 0.075 |
| Vitamin B-12                    | µg | 0.00  |
| Choline, total                  | mg | 6.2   |
| Betaine                         | mg | 0.2   |
| Vitamin C                       | mg | 8.4   |
| Vitamin D                       | µg | 0.0   |
| Vitamin D (IU)                  | IU | 0     |
| Vitamin K                       | µg | 4.0   |
| Tocopherol, alpha               | mg | 0.33  |
| Tocopherol, beta                | mg | 0.00  |
| Tocopherol, delta               | mg | 0.00  |
| Tocopherol, gamma               | mg | 0.00  |

#### Amino Acids

|               |   |       |
|---------------|---|-------|
| Tryptophan    | g | 0.002 |
| Threonine     | g | 0.011 |
| Isoleucine    | g | 0.011 |
| Leucine       | g | 0.024 |
| Lysine        | g | 0.022 |
| Methionine    | g | 0.002 |
| Cystine       | g | 0.002 |
| Phenylalanine | g | 0.011 |
| Tyrosine      | g | 0.002 |
| Valine        | g | 0.022 |
| Arginine      | g | 0.011 |
| Histidine     | g | 0.009 |
| Alanine       | g | 0.020 |
| Aspartic acid | g | 0.127 |
| Glutamic acid | g | 0.046 |
| Glycine       | g | 0.016 |
| Proline       | g | 0.011 |
| Serine        | g | 0.018 |

#### Lipids

|                                     |   |       |
|-------------------------------------|---|-------|
| Fatty acids, saturated, total       | g | 0.051 |
| Fatty acids, monounsaturated, total | g | 0.013 |

---

|                                     |    |       |
|-------------------------------------|----|-------|
| Fatty acids, polyunsaturated, total | g  | 0.093 |
| Total plant sterol                  | mg | 22    |
| Cholesterol                         | mg | 0     |
| <b>Other components</b>             |    |       |
| Caffeine                            | mg | 0     |
| Theobromine                         | mg | 0     |
| Lycopene                            | µg | 0     |
| Beta cryptozanthin                  | µg | 20    |

---

Whereas Phytochemicals taken from the Canadian Nutrient File (7).

**Table S2.** Dietary value of a clarified apple juice (in can or bottle).

| Nutrient                          | Unit | Value per 250ml (portion) |
|-----------------------------------|------|---------------------------|
| <b>Macronutrients</b>             |      |                           |
| Moisture                          | g    | 231.23                    |
| Ash                               | g    | 0.60                      |
| Protein                           | g    | 0.26                      |
| Total Fat                         | g    | 0.34                      |
| Carbohydrate                      | g    | 29.61                     |
| Energy                            | kCal | 121                       |
| <b>Carbohydrates</b>              |      |                           |
| Fibre, total dietary              | g    | 0.5                       |
| Glucose                           | g    | 6.89                      |
| Fructose                          | g    | 15.02                     |
| Maltose                           | g    | 0.00                      |
| Galactose                         | g    | 0.00                      |
| Lactose                           | g    | 0.00                      |
| Sucrose                           | g    | 3.30                      |
| Sorbitol                          | g    | 2.62                      |
| Sugars, total                     | g    | 25.21                     |
| <b>Minerals</b>                   |      |                           |
| Calcium, Ca                       | mg   | 21                        |
| Iron, Fe                          | mg   | 0.31                      |
| Magnesium, Mg                     | mg   | 13                        |
| Phosphorus, P                     | mg   | 18                        |
| Potassium, K                      | mg   | 265                       |
| Sodium, Na                        | mg   | 10                        |
| Zinc, Zn                          | mg   | 0.05                      |
| Copper, Cu                        | mg   | 0.031                     |
| Manganese, Mn                     | mg   | 0.194                     |
| Selenium, Se                      | µg   | 0.3                       |
| <b>Vitamins</b>                   |      |                           |
| Beta carotene                     | µg   | 0                         |
| Retinol                           | µg   | 0                         |
| Retinol activity equivalents, RAE | µg   | 0                         |
| Folacin, total                    | µg   | 0                         |
| Folic acid, synthetic form        | µg   | 0                         |
| Folate, naturally occurring       | µg   | 0                         |
| Dietary folate equivalents, DFE   | µg   | 0                         |
| Niacin                            | mg   | 0.191                     |
| Niacin equivalents                | NE   | 0.239                     |
| Pantothenic acid                  | mg   | 0.128                     |

|                                        |    |                                       |
|----------------------------------------|----|---------------------------------------|
| Riboflavin                             | mg | 0.045                                 |
| Thiamin                                | mg | 0.055                                 |
| Vitamin B-6                            | mg | 0.047                                 |
| Vitamin B-12                           | µg | 0.00                                  |
| Choline, total                         | mg | 4.7                                   |
| Betaine                                | mg | 0.3                                   |
| Vitamin C                              | mg | 2.4                                   |
| Vitamin D                              | µg | 0.0                                   |
| Vitamin D (IU)                         | IU | 0                                     |
| Vitamin K                              | µg | 0.0                                   |
| Tocopherol, alpha                      | mg | 0.03                                  |
| <b>Lipids</b>                          |    |                                       |
| Fatty acids, saturated, total          | g  | 0.058                                 |
| Fatty acids, monounsaturated, total    | g  | 0.016                                 |
| Fatty acids, polyunsaturated, total    | g  | 0.102                                 |
| Cholesterol                            | mg | 0                                     |
| <b>Other components</b>                |    |                                       |
| Caffeine                               | mg | 0                                     |
| Theobromine                            | mg | 0                                     |
| Phenolic compounds*                    |    | 62.64*                                |
| (hydroxycinnamic acids and flavonoids) |    | (in comparison in apple mash: 114.8*) |
